# Supplementary material for: ROS-Eliminating Carboxymethyl Chitosan Hydrogel to Enhance Burn Wound-Healing Efficacy
Source: PubMed Central journal article supplement (PMC8238405; doi:10.3389/fphar.2021.679580), 2021-06-14
Supplement: Image1.pdf [file Image1.pdf]

# ROS-eliminating carboxymethyl chitosan hydrogel to enhance burn wound healing efficacy

Cheng Yang<sup>1, #</sup>, Yuhui Chen<sup>1, #</sup>, Hai Huang<sup>1</sup>, Shicai Fan<sup>1</sup>, Chengliang Yang<sup>2</sup>, Liping Wang<sup>3</sup>, Wenqiang Li<sup>4</sup>, Wenxin Niu<sup>5, \*</sup>, Jianwen Liao<sup>1, \*</sup>

<sup>1</sup> Department of Orthopaedic Trauma, Center for Orthopaedic Surgery, The Third Affiliated Hospital of Southern Medical University, Guangzhou 510630, China;

<sup>2</sup> Department of Orthopedics, Affiliated Hospital of Youjiang Medical University for Nationalities, Baise, Guangxi 533000, China;

<sup>3</sup> UniSA Clinical & Health Science, and UniSA Cancer Research Institute, University of South Australia, Adelaide, SA 5001, Australia;

<sup>4</sup> Gungdong provincial engineering technology research center for sports assistive devices, Guangzhou Sport University, Guangzhou 510630, China;

<sup>5</sup> Yangzhi Rehabilitation Hospital, Tongji University School of Medicine, Shanghai 200000, China;

Cheng Yang, and Yuhui Chen: These authors contributed equally to this work.

\*Corresponding authors: Wenxin Niu (niu@tongji.edu.cn); Jianwen Liao ([JWLiao1213@163.com](mailto:JWLiao1213@163.com);

[2867705754@qq.com](mailto:2867705754@qq.com))

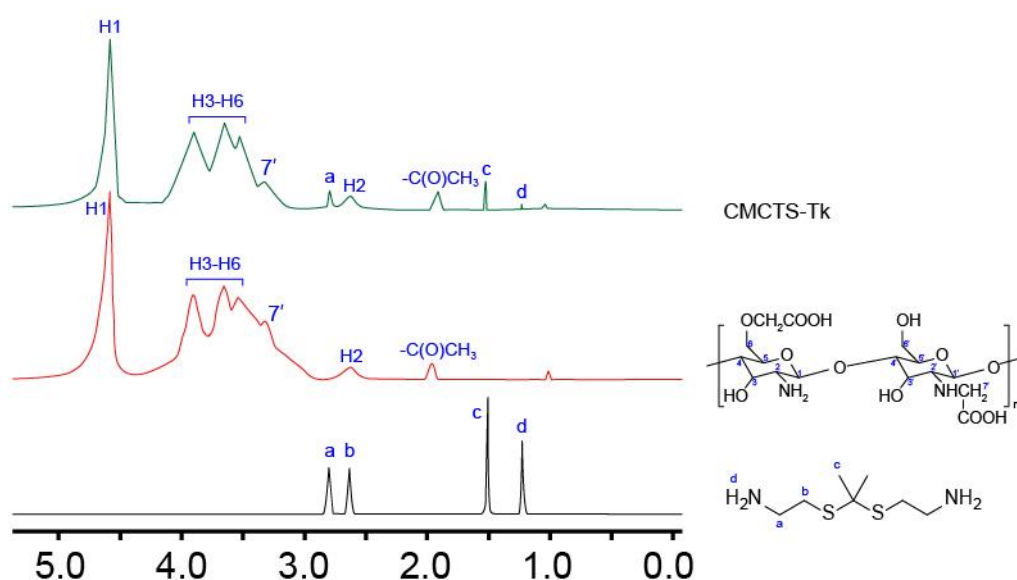

Figure S1. <sup>1</sup>H NMR spectra for 2,2'-(propane-2,2-diyl)disulfanediyl)diethanamine (Tk), carboxymethyl chitosan (CMCTS) and CMCTS-Tk.
